# Supplementary material for: Downregulating Mitochondrial DNA Polymerase γ in the Muscle Stimulated Autophagy, Apoptosis, and Muscle Aging-Related Phenotypes in Drosophila Adults
Source: MDPI journal article supplement (doi:10.3390/biom12081105), 2022-08-11
Supplement: s1 [file s1]

Supplementary figure legends

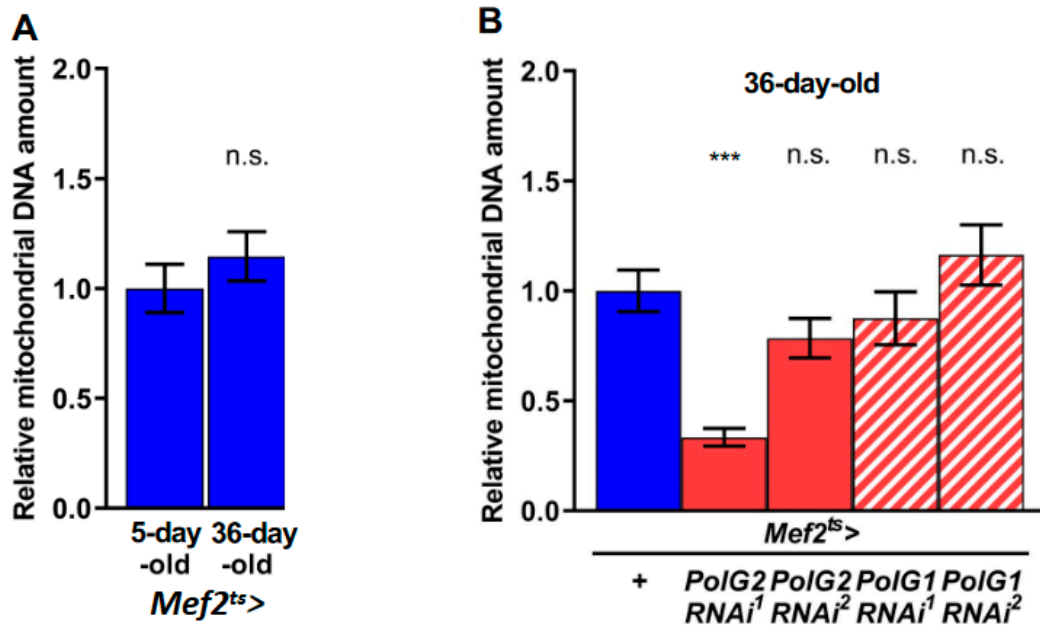

**Fig. S1. Quantification of mitochondrial DNA relative to nuclear DNA in adult thoraxes harboring *PolG1RNAi* and *PolG2RNAi***

(A) Quantification of the average amount of mitochondrial DNA (mtDNA) relative to nuclear DNA in the thoraxes of 5-day-old and 36-day-old adults (*Mef2<sup>ts</sup>>*) by qPCR. The mtDNA amount in 5-day-old control adults is presented as 1.0. (B) Relative amount of mtDNA relative to nuclear DNA in the thoraxes from 36-day-old control adults (*Mef2<sup>ts</sup>>*), and adults harboring *PolG2RNAi* (*Mef2<sup>ts</sup>>PolG2RNAi<sup>1</sup>* and *Mef2<sup>ts</sup>>PolG2RNAi<sup>2</sup>*) and *PolG1RNAi* (*Mef2<sup>ts</sup>>PolG1RNAi<sup>1</sup>* and *Mef2<sup>ts</sup>>PolG1RNAi<sup>2</sup>*) by qPCR. The mtDNA amount in control adults at 36-day-old is presented as 1.0. (A; n=3 (triplicates), B; n=9 (three biological triplicates). Welch's *t*-test and one-way ANOVA with Bonferroni's multiple comparisons test were applied to compare the mean differences in A and B, respectively. \*\*\**p* < 0.001, ns; not significant *p* > 0.05.

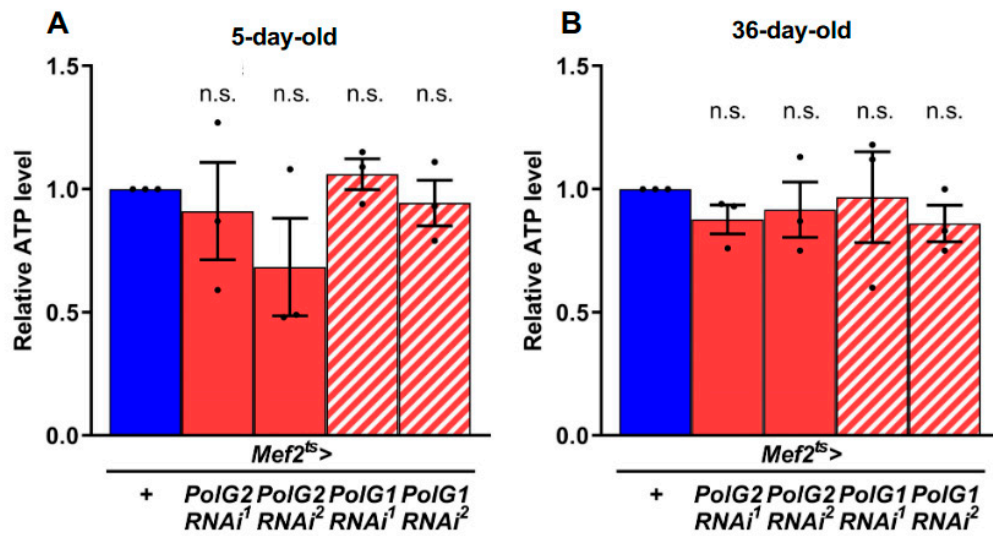

**Fig. S2. Relative levels of ATP contained in adult thoraxes harboring *PolyRNAi***

(A, B) Quantification of ATP levels in 10 thoraxes using a luciferase assay. Thoraxes of 5-day-old (A), and 36-day-old (B) control adults, and adults harboring muscle specific *PolG2RNAi* (*Mef2<sup>ts</sup>>PolG2RNAi<sup>1</sup>*, *Mef2<sup>ts</sup>>PolG2RNAi<sup>2</sup>*) and *PolG1RNAi* (*Mef2<sup>ts</sup>>PolG1RNAi<sup>1</sup>* and *Mef2<sup>ts</sup>>PolG1RNAi<sup>2</sup>*) were prepared. The average ATP content was normalized to total protein content. (n=3 (three repeated assays), n.s.; not significant, one-way ANOVA with Bonferroni's multiple comparisons test). Error bar; s.e.m.

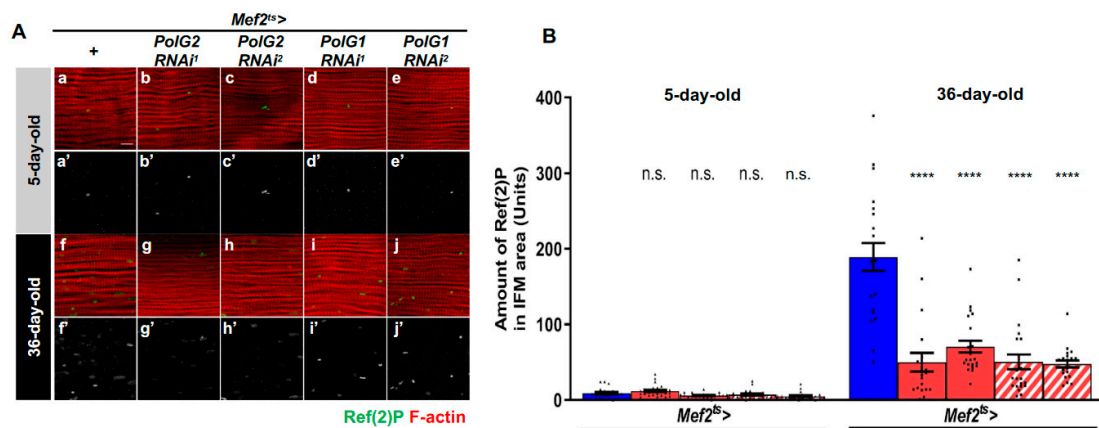

**Fig. S3. Immunostaining and quantification of autophagy adaptor protein, Ref(2)P in adult IFMs harboring the muscle-specific *PolyRNAi***

(A) Immunostaining of IFMs from 5 and 36-day-old adults (A) or 5- and 36-day-old control adults and adults harboring muscle-specific *PolG2RNAi* and *PolG1RNAi* (*Mef2<sup>ts</sup>>PolG2RNAi<sup>1</sup>*, *Mef2<sup>ts</sup>>PolG2RNAi<sup>2</sup>*, *Mef2<sup>ts</sup>>PolG1RNAi<sup>1</sup>*, *Mef2<sup>ts</sup>>PolG1RNAi<sup>2</sup>*) were prepared. The average ATP content was normalized to total protein content. (n=3 (three repeated assays), n.s.; not significant, one-way ANOVA with Bonferroni's multiple comparisons test). Error bar; s.e.m.

*Mef2<sup>ts</sup>>PolG1RNAi<sup>1</sup>* and *Mef2<sup>ts</sup>>PolG1RNAi<sup>2</sup>*) with anti-Ref(2)P antibody (green) and phalloidin for F-actin (red). Scale bar: 10  $\mu$ m. (B) Quantification of the Ref(2)P foci in the IFMs of the 5- and 36-day-old control flies (*Mef2<sup>ts</sup>>+*, (n=21 for 5-day-old, n=20 for 36-day-old) and flies harboring muscle-specific *PolG2RNAi* and *PolG1RNAi* (*Mef2<sup>ts</sup>>PolG2RNAi<sup>1</sup>* (n=21 for both age groups), *Mef2<sup>ts</sup>>PolG2RNAi<sup>2</sup>* (n=22, 20), *Mef2<sup>ts</sup>>PolG1RNAi<sup>1</sup>* (n=22, 21) and *Mef2<sup>ts</sup>>PolG1RNAi<sup>2</sup>* (n=24, 22). Total pixels of the foci per single confocal optical fields were quantified. The number is represented using 10 pixels as a unit. (\*\*\*\**p*<0.0001, one-way ANOVA with Bonferroni's multiple comparisons test). Error bars; s.e.m.

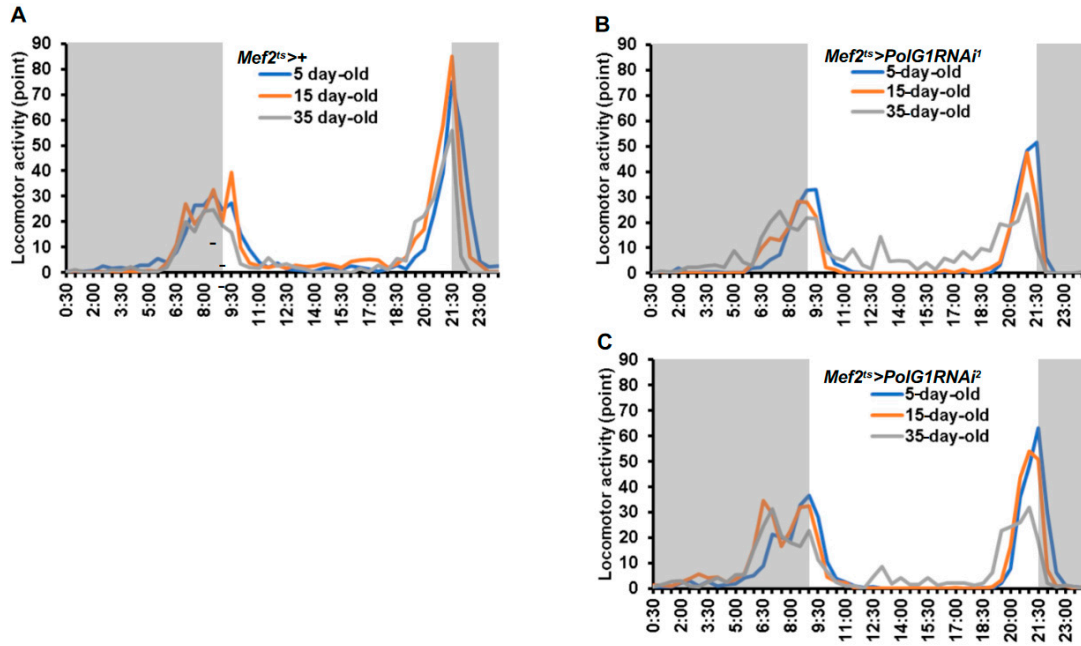

**Fig. S4. Assay of daily locomotor activity of adults harboring muscle-specific *PolyRNAi***

(A-C) Daily locomotor activity of 5-, 15-, and 35-day-old flies under a 12-h/12-h light-dark cycle. (A) Control flies (*Mef2<sup>ts</sup>>+*), (B, C) flies harboring muscle-specific *PolG1RNAi* (*Mef2<sup>ts</sup>>PolG1RNAi<sup>1</sup>* (B), *Mef2<sup>ts</sup>>PolG1RNAi<sup>2</sup>* (C)). Higher and more pointed peaks of locomotor activity are seen at the end of the daytime, just before light was turned off (around 21:00) and another lower and relatively broader peak is seen around 08:00, just before the lighting was switched on. *PolG1RNAi* flies exhibited a remarkable decline in locomotor activity at a higher peak with age compared with controls. The 35-day-old flies harboring *PolG1RNAi* (*Mef2<sup>ts</sup>>PolG1RNAi<sup>1</sup>* and *Mef2<sup>ts</sup>>PolG1RNAi<sup>2</sup>*) showed relatively higher locomotor activity during the daytime (B, C), while control adults at the same age showed the background activity level (A) (n=20 flies in every genotype).
